# Supplementary material
Source: PubMed Central journal article supplement (PMC3633164)
Supplement: NIHMS451474-supplement-01.pdf [file NIHMS451474-supplement-01.pdf]

**Web Supplement.** Caffeine Halothane Contracture Test, Ryanodine Receptor Mutations, Variants and Polymorphisms, Clinical Grading Scale, and Personal and Family Medical Histories of Included Subjects

| Subject # | Maximum CHCT contracture (g) |              | Exon Number | Amino Acid Substitution | Inclusion Indication | CGS | Personal Anesthetic and Medical History                                                                                                           | Family History                                                                             |
|-----------|------------------------------|--------------|-------------|-------------------------|----------------------|-----|---------------------------------------------------------------------------------------------------------------------------------------------------|--------------------------------------------------------------------------------------------|
|           | Caffeine (2mM)               | Halothane 3% |             |                         |                      |     |                                                                                                                                                   |                                                                                            |
| 1         | 0.34                         | 2.55         | 1           | L13R                    | MH                   | -   | -                                                                                                                                                 | -                                                                                          |
| 2         | 0.83                         | 2.7          | 2           | G40A                    | FH                   | -   | Had GA x 2, took atorvastatin without adverse effect<br>Muscle at time of CHCT had rare atrophic fibers and diffusely distributed internal nuclei | Sibling had apparent MH episode<br>2 first-degree relatives had positive CHCT              |
| 3         | 1.9                          | 6.1          | 6           | R163C                   | FH                   | -   | Had GA x 2 with no signs of MH                                                                                                                    | Apparent MH death in second-degree relative<br>One first-degree relative had positive CHCT |
| 4         | 0.9                          | 4            | 6           | R163C                   | FH                   | -   | Had GA x 1 with no signs of MH                                                                                                                    | Perioperative death of sibling, etiology determined                                        |
| 5         | 1.3                          | 5.6          | 9           | G248R                   | FH                   | -   | -                                                                                                                                                 | Mother died of apparent MH<br>Mother's relatives had positive CHCTs                        |

|   |     |     |    |       |          |    |                                                                                                                                                                                                                                                                                       |                                                                                                                                              |
|---|-----|-----|----|-------|----------|----|---------------------------------------------------------------------------------------------------------------------------------------------------------------------------------------------------------------------------------------------------------------------------------------|----------------------------------------------------------------------------------------------------------------------------------------------|
| 6 | na  | na  | 9  | G248R | MH       | 43 | Subject reported that in 1983 GA with halothane and succinylcholine was complicated by generalized rigidity, increase CK, acidosis ventricular fibrillation, and rapidly increase temperature CK increase was not counted in CGS because value was not provided                       | -                                                                                                                                            |
| 7 | 2.2 | 7.8 | 11 | G341R | MH       | -  | Surgeon reported that this subject had an MH episode in an outpatient surgery clinic                                                                                                                                                                                                  | -                                                                                                                                            |
| 8 | na  | na  | 11 | G341R | MH<br>FH | -  | Subject reported that after < 30 minutes of halothane in 1977, he had lethargy and low grade fever lasted ~ 10 days. After GA in 1968 there was uncontrollable muscle shaking In 1980 CHCT was reported to be positive (pre-standardization) No quantitative CHCT data are available. | Subject reported apparent MH death in cousin                                                                                                 |
| 9 | 2.4 | 3.6 | 14 | L487P | FH       | -  | Never had GA                                                                                                                                                                                                                                                                          | Parent died of fulminant MH, the details of which were reviewed by the MH Diagnostic Center Director MH was listed on the death certificate. |

|    |      |      |          |                 |    |    |                                                                                                                                                                                                                                                                    |                                                                              |
|----|------|------|----------|-----------------|----|----|--------------------------------------------------------------------------------------------------------------------------------------------------------------------------------------------------------------------------------------------------------------------|------------------------------------------------------------------------------|
| 10 | 1    | 1.3  | 14<br>86 | V518A<br>Y3933C | MH | 5  | Postoperatively renal failure occurred. <sup>a</sup>                                                                                                                                                                                                               | -                                                                            |
| 11 | 1    | 6.1  | 17       | R614C           | FH | -  | Subject was muscular, had heat stroke and one GA without signs of MH<br>Muscle at time of CHCT had normal histology and histochemistry.                                                                                                                            | Sibling died of apparent MH<br>Heatstroke was reported in the family history |
| 12 | 0.97 | 7.35 | 17       | R614C           | MH | 30 | Had 4 GA x 4.<br>Only in 1989 was MH suspected after enflurane and IV succinylcholine, severe MMR occurred with CK 16,000 IU/L, ETCO <sub>2</sub> 49 mm Hg<br>Muscle at time of CHCT had a few fibers with small empty subsarcolemmal spaces, histology was normal | -                                                                            |

|    |      |      |    |       |          |    |                                                                                                                                                                                   |                                                                                                                                                                                                                                                                                                                                                                                                                                                                     |
|----|------|------|----|-------|----------|----|-----------------------------------------------------------------------------------------------------------------------------------------------------------------------------------|---------------------------------------------------------------------------------------------------------------------------------------------------------------------------------------------------------------------------------------------------------------------------------------------------------------------------------------------------------------------------------------------------------------------------------------------------------------------|
| 13 | 0.41 | 3.23 | 17 | R614C | FH       | -  | Subject reported heat stroke and also muscle pain over entire body when training >15 min for long distance running<br>Strabismus and 4 GA x 4 without MH were noted.              | Subject's child had GA x 8 with one report of fulminant MH in 1987 after halothane & IV succinylcholine<br>MMR, sinus tachycardia, and cyanosis occurred, pCO <sub>2</sub> was 49 mm Hg with controlled ventilation, arterial pH was 7.2, BE was -10 mE/L, and CK was 43,600 IU/L<br>MH was successfully treated with dantrolene<br>CHCT was positive<br>Muscle at time of CHCT had focal decreases in oxidative activity suggestive of cores and normal histology. |
| 14 | 0.9  | 4.9  | 17 | R614C | FH       | -  | -                                                                                                                                                                                 | Elevated CK, postoperative fever, suspected MH                                                                                                                                                                                                                                                                                                                                                                                                                      |
| 15 | na   | na   | 17 | R614C | MH<br>FH | 48 | GA with MH in 1981 when MMR occurred after succinylcholine complicated by tachycardia, PVCs<br>BE-10 mEq/L, myoglobinuria CK 21,000 IU/L, and effective treatment with dantrolene | Parent had an abnormal prestandardization CHCT in which the muscle twitched even during dissection This muscle had fibers containing acid phosphatase<br>Rare fibers had a decrease in oxidative activity<br>There was a slight increase in fibrous connective tissue                                                                                                                                                                                               |
| 16 | 0.6  | 0.7  | 24 | V974M | -        | -  | -                                                                                                                                                                                 | -                                                                                                                                                                                                                                                                                                                                                                                                                                                                   |

|    |      |      |          |                                |                |   |                                                                                                                                                                                                    |                                                                                     |
|----|------|------|----------|--------------------------------|----------------|---|----------------------------------------------------------------------------------------------------------------------------------------------------------------------------------------------------|-------------------------------------------------------------------------------------|
| 17 | na   | na   | 24       | R975W                          | CC<br>D        | - | GA with suspected MH event in late 1960s No details are available<br>Subject reported weekly episodes of muscle cramps and weakness and heat and exercise intolerance due muscle pain and weakness | -                                                                                   |
| 18 | 0.95 | 1.8  | 24       | R1043H                         | FH             | - | -                                                                                                                                                                                                  | Possible MH episode in second-degree relative                                       |
| 19 | 2.11 | 4.17 | 25       | <i>R1109L</i>                  | FH             | - | Subject reported heat stroke or prostration and one GA without signs of MH<br>Muscle at time of CHCT showed some internal nuclei<br>Histochemistry was normal                                      | Parent died of apparent MH<br>3 second- or third-degree relatives had positive CHCT |
| 20 | n/a  | 1.6  | 29       | <i>K1393R</i>                  | -              | - | -                                                                                                                                                                                                  | -                                                                                   |
| 21 | 1.18 | 5.74 | 29       | <i>K1393R</i>                  | Elevated<br>CK | - | -                                                                                                                                                                                                  | -                                                                                   |
| 22 | 0    | 1.2  | 29       | <i>K1393R</i>                  | FH             | - | Muscle cramps worse with exercise                                                                                                                                                                  | Similar symptoms in family members                                                  |
| 23 | 0.5  | 2.9  | 34<br>38 | <i>P1787L</i><br><i>G2060C</i> | -              | - | -                                                                                                                                                                                                  | -                                                                                   |

|    |     |     |    |        |               |    |                                                                                                                                                                                                                                                          |                                                                       |
|----|-----|-----|----|--------|---------------|----|----------------------------------------------------------------------------------------------------------------------------------------------------------------------------------------------------------------------------------------------------------|-----------------------------------------------------------------------|
| 24 | 0.3 | 0.9 | 38 | G2060C | FH            | -  | -                                                                                                                                                                                                                                                        | -                                                                     |
| 25 | na  | na  | 38 | G2060C | MH            | 38 | In 2007, IV induction, desflurane and succinylcholine were followed by MMR, hypercarbia, sinus tachycardia, and resolution after dantrolene<br>The subject reported months of headache, frequent sweating and inability to climb stairs after this event | -                                                                     |
| 26 | 1.6 | 5.3 | 39 | R2163H | MH            | -  | Fulminant MH was reported during GA for surgery with a extremity tourniquet                                                                                                                                                                              | -                                                                     |
| 27 | na  | na  | 39 | V2168M | MH<br>CC<br>D | -  | Muscle biopsy for histology found CCD<br>GA in late 1970s suspected for MH<br>Delayed motor milestones                                                                                                                                                   | -                                                                     |
| 28 | 1.3 | 2.7 | 40 | T2206M | FH            | -  | Had GA x 3 without signs of MH                                                                                                                                                                                                                           | Fatal apparent MH reported in a nephew. 2 relatives had positive CHCT |

|    |      |      |          |                  |    |    |                                                                                                                                                                                                                               |                                                                                    |
|----|------|------|----------|------------------|----|----|-------------------------------------------------------------------------------------------------------------------------------------------------------------------------------------------------------------------------------|------------------------------------------------------------------------------------|
| 29 | 2.72 | 6    | 40       | T2206M           | FH | -  | Muscle cramps weekly<br>GA x 4 without signs of MH<br>CHCT muscle had diffusely distributed internal nuclei, a single fiber with multiple cytoplasmic inclusion bodies and increased subsarcolemmal oxidative enzyme activity | Sibling and 2 distant relatives were reported to have survived fulminant MH events |
| 30 | 1    | 1.44 | 40       | T2206M           | MH | 48 | One GA complicated by tachycardia, MMR<br>PaCO <sub>2</sub> 143 mm Hg, pH 6.90 ~3 hours after induction<br>Resolved after dantrolene<br>Normal histology and histochemistry of muscle at the time of CHCT                     | -                                                                                  |
| 31 | na   | na   | 40       | T2206M           | MH | 30 | During GA with increased minute ventilation ETCO <sub>2</sub> was > 60 mm Hg, temperature reached 40° C<br>CK was 6,000 IU/L<br>Muscle histology was abnormal                                                                 | -                                                                                  |
| 32 | 0.3  | 2.3  | 41<br>44 | R2248H<br>I2358L | MH | 15 | CGS was reported to be 15                                                                                                                                                                                                     | -                                                                                  |
| 33 | 0.3  | 1.3  | 43       | <i>I2321V</i>    | MH | 15 | MMR                                                                                                                                                                                                                           | -                                                                                  |

|    |      |     |          |                  |          |    |                                                                                                                                                                                                                                   |                                                                |
|----|------|-----|----------|------------------|----------|----|-----------------------------------------------------------------------------------------------------------------------------------------------------------------------------------------------------------------------------------|----------------------------------------------------------------|
| 34 | 3.3  | 5.7 | 43<br>24 | R2336H<br>R1043C | MH<br>FH | -  | One GA with increased heart rate and temperature to 39.4° C, postoperative muscle pain and cramping                                                                                                                               | Parent had possible MH ~ 50 y ago<br>Sibling has positive CHCT |
| 35 | 0.2  | 1.5 | 43       | N2342S           | MH       | 15 | MMR                                                                                                                                                                                                                               | -                                                              |
| 36 | 1.36 | 5.9 | 44       | del E 2347       | FH       | -  | One GA with no signs of MH                                                                                                                                                                                                        | MH with CGS 60                                                 |
| 37 | 0.5  | 5   | 44       | N2351H           | MH       | 48 | CGS was reported to be 48                                                                                                                                                                                                         | -                                                              |
| 38 | 1.25 | 3.4 | 44       | V2354M           | MH       | 28 | Subject was muscular<br>One GA with succinylcholine for emergency surgery with fulminant MH reported; pH 7.26<br>ETCO <sub>2</sub> 69 mm Hg,<br>CK 6,000 IU/L, K <sup>+</sup> 5.6 mEq/L,<br>temperature 38.9°C, sinus tachycardia | -                                                              |
| 39 | 2.6  | 9.5 | 44       | R2355W           | MH       | -  | GA suspicious for MH                                                                                                                                                                                                              | -                                                              |
| 40 | 1.82 | 1.6 | 44       | R2355W           | MH       | -  | -                                                                                                                                                                                                                                 | -                                                              |
| 41 | 0.3  | 5.1 | 44       | R2355W           | MH       | -  | Postoperative MH suspected                                                                                                                                                                                                        | -                                                              |



|    |      |      |          |                         |          |    |                                                                                                                                                                                                                                                                   |                                                                                                                                                                |
|----|------|------|----------|-------------------------|----------|----|-------------------------------------------------------------------------------------------------------------------------------------------------------------------------------------------------------------------------------------------------------------------|----------------------------------------------------------------------------------------------------------------------------------------------------------------|
| 42 | 1.9  | 1.1  | 45<br>34 | R2435L<br><i>P1787L</i> | FH       | -  |                                                                                                                                                                                                                                                                   | Sibling died of apparent MH                                                                                                                                    |
| 43 | 1.17 | 4.01 | 45       | G2434R                  | FH       | -  | Subject was muscular<br>One GA without signs of MH<br>Muscle histology and histochemistry at time of CHCT were abnormal with small tubular aggregates observed                                                                                                    | Parent had possible MH event                                                                                                                                   |
| 44 | 1.7  | 8.08 | 45       | G2434R                  | MH<br>FH | -  | 2 possible MH events with rapidly increasing temperature as the only MH signs noted<br>One GA with no signs of MH                                                                                                                                                 | 3 generations in this family reported problems with GA<br>Cousin had positive CHCT after his own suspected MH episode (CGS 15 with MMR as the only sign of MH) |
| 45 | 0.74 | 7.71 | 45       | G2434R                  | MH       | 30 | Athletic, GA x 2 with MH in the 2 <sup>nd</sup> GA in 1999 after volatile agent with succinylcholine, generalized rigidity, CK 70,000 IU/L, muscle weakness were noted<br>Muscle at time of CHCT had occasional fibers with increased red subsarcolemmal staining | -                                                                                                                                                              |
| 46 | 1    | 7.4  | 45       | G2434R                  | FH       | -  | One GA with no signs of MH                                                                                                                                                                                                                                        | Perioperative death of sibling, etiology undetermined                                                                                                          |

|    |     |      |    |        |    |    |                                                                                                                                                                                                                 |                                                                                                                                                                                                                                                                                                                                 |
|----|-----|------|----|--------|----|----|-----------------------------------------------------------------------------------------------------------------------------------------------------------------------------------------------------------------|---------------------------------------------------------------------------------------------------------------------------------------------------------------------------------------------------------------------------------------------------------------------------------------------------------------------------------|
| 47 | 3.9 | 10.5 | 45 | G2434R | MH | 45 | MMR and total body rigidity<br>PaCO <sub>2</sub> 57 mm Hg, temperature 37° C<br>K <sup>+</sup> 7.6 mEq/L, CK 350,000 IU/L                                                                                       |                                                                                                                                                                                                                                                                                                                                 |
| 48 | 1.5 | 3.1  | 45 | G2434R |    | -  |                                                                                                                                                                                                                 | -                                                                                                                                                                                                                                                                                                                               |
| 49 | na  | na   | 45 | G2434R | FH | -  | Positive CHCT in 1983 (prestandardization, slight increase in connective tissue, more type 2 than type 1 fibers, very slight increase in lipid droplets in muscle fibers)<br>One GA in 2004 without signs of MH | Sibling died of apparent MH during GA.                                                                                                                                                                                                                                                                                          |
| 50 | na  | na   | 45 | R2454H | FH | -  | Muscle pain after GA in 1968                                                                                                                                                                                    | One apparent MH death reported during GA in 1947 at age 17 y and at least 1 more reported MH death and 1 positive CHCT in different relatives<br>At time of CHCT CK was 950 IU and muscle had spontaneous contractures<br>Reports of chronic muscle pain and intolerance to heat and exercise, chronic increase CK in relatives |

|    |    |    |    |        |                 |    |                                                                                                                                                                                                                                                                                              |                                                                                    |
|----|----|----|----|--------|-----------------|----|----------------------------------------------------------------------------------------------------------------------------------------------------------------------------------------------------------------------------------------------------------------------------------------------|------------------------------------------------------------------------------------|
| 51 | na | na | 47 | R2508H | MH<br>CC<br>D   | 53 | Subject reported that GA in 1979 was complicated by total body rigidity, rapidly increase temperature, increase heart rate, rapid reversal by dantrolene, CK > 100,000 IU<br>Months were required for recovery of strength                                                                   | Progressive CCD in 2 first degree relatives, diagnosed by the family's neurologist |
| 52 | 0  | 0  | 66 | R3238G | CC<br>D         | -  | Subject presented with muscle weakness and fatigue                                                                                                                                                                                                                                           | -                                                                                  |
| 53 | na | na | 66 | R3283Q | MH<br>Deat<br>h | 76 | Previous GA x 23, after several hours of volatile agent, total body rigidity pCO > 100 mm Hg, MV 3 times predicted, K <sup>+</sup> 7.5 mEq/L<br>temperature 41.5°C, cardiac arrest, pH 6.9, BE - 10 mEq/L, acidosis less after dantrolene<br><i>CACNA1S</i> variant, V875M, was also present | -                                                                                  |

|    |      |     |           |                         |           |    |                                                                                                                                                                                                                                                    |                                                                                                                                                                                                            |
|----|------|-----|-----------|-------------------------|-----------|----|----------------------------------------------------------------------------------------------------------------------------------------------------------------------------------------------------------------------------------------------------|------------------------------------------------------------------------------------------------------------------------------------------------------------------------------------------------------------|
| 54 | 0.8  | 5.2 | 71        | R3539H                  | MH        | 40 | GA x 2.<br>MH was suspected due to MMR and total body rigidity after succinylcholine and halothane anesthesia, inappropriate tachypnea, PaCO <sub>2</sub> 45 mm Hg during spontaneous ventilation, temperature 39°C, recovered without dantrolene. | -                                                                                                                                                                                                          |
| 55 | 1    | 2.6 | 72<br>101 | E3583Q<br>V4849I        | MH<br>FH  | 18 | Suspected MH episode                                                                                                                                                                                                                               | Sibling died of apparent MH<br>Relatives had presumed MH episodes                                                                                                                                          |
| 56 | 0.85 | 7.5 | 76        | T3711R                  | FH        | -  | Muscular<br>GA x 4 with no signs of MH<br>CK was ~400 IU/L (normal 200 IU) at time of CHCT                                                                                                                                                         | Sibling and parent had apparent MH episodes during GA<br>3 relatives had chronic CK elevations of less than 1,000 IU/L<br>Family history is complex because of coexistence of RYR1 R614C in some relatives |
| 57 | 1.2  | 2.2 | 87        | W3985R                  | MH        | -  | GA suspicious for MH in childhood                                                                                                                                                                                                                  | -                                                                                                                                                                                                          |
| 58 | 1.9  | 8.8 | 87<br>34  | D3986E<br><i>P1787L</i> | <i>MH</i> | -  | GA suspicious for MH                                                                                                                                                                                                                               | -                                                                                                                                                                                                          |

|    |      |      |     |        |          |    |                                                                                                                                                                     |                                                                        |
|----|------|------|-----|--------|----------|----|---------------------------------------------------------------------------------------------------------------------------------------------------------------------|------------------------------------------------------------------------|
| 59 | 2.5  | 10.8 | 87  | D3986E | MH       | -  | GA with MMR as a child<br>Years later fulminant MH followed by daily cramps and exercise induced rhabdomyolysis without increased metabolism                        | -                                                                      |
| 60 | 1.77 | 6.95 | 90  | G4178V | FH       | -  | 2 GAs without signs of MH<br>Muscle pain and increased CK after fluvastatin<br>CK was 100 IU/L above normal and type 2 fiber atrophy were found at the time of CHCT | Parent and sibling died of apparent MH.                                |
| 61 | 3.3  | 6.3  | 91  | M4230R | MH<br>FH | -  | Abnormal skeleton therefore muscle was taken from the soleus for CHCT                                                                                               | GA with apparent MH death and parent reported to have had MMR          |
| 62 | 0.5  | 9.9  | 100 | Q4837E | FH       | -  | -                                                                                                                                                                   | -                                                                      |
| 63 | na   | na   | 101 | V4847L | MH       | 23 | GA suspicious for MH in childhood<br>CGS reported by MH Diagnostic Center Director                                                                                  | -                                                                      |
| 64 | 1.9  | 9.8  | 101 | V4849I | MH       | -  | GA suspicious for MH                                                                                                                                                | -                                                                      |
| 65 | 0.3  | 3.6  | 101 | V4849I | FH       | -  | -                                                                                                                                                                   | Sibling died of apparent MH<br>First-degree relative had positive CHCT |
| 66 | 0.9  | 5    | 101 | V4849I | MH<br>FH | 18 | GA suspicious for MH in childhood                                                                                                                                   | -                                                                      |

|    |      |      |     |                            |          |    |                                                                                                       |                                                                                                      |
|----|------|------|-----|----------------------------|----------|----|-------------------------------------------------------------------------------------------------------|------------------------------------------------------------------------------------------------------|
| 67 | 1.15 | 6.4  | 101 | R4861H                     | FH       | -  | Never had GA<br>Prefers cool environment                                                              | First-degree relative and more distant relatives had positive CHCT after suspected MH event          |
| 68 | 0.4  | 2.1  | 102 | A4906G                     | FH       | -  | -                                                                                                     | Sibling died of apparent MH                                                                          |
| 69 | 2    | 11.3 | 103 | D4939E                     | MH<br>FH | 15 | MMR after succinylcholine                                                                             | 3 relatives with chronically elevated CK<br>Grandparent had ADR to succinylcholine                   |
| 70 | 0.84 | 8.42 | 103 | A4940T                     | FH       | -  | GA x 8 with no signs of MH                                                                            | 3 suspected MH events<br>3 positive CHCT<br>Rhabdomyolysis with atorvastatin                         |
| 71 | 0.85 | 2.1  | 104 | P4973L                     | -        | -  | -                                                                                                     | -                                                                                                    |
| 72 | 0.67 | 1.47 | -   | nothing in all <i>RYRI</i> | FH       | -  | GA x 1 with no signs of MH                                                                            | Positive CHCT in 4 relatives (3 siblings and 1 nephew) after sibling had suspected MH event (CGS 23) |
| 73 | 0.3  | 1.5  | -   | nothing in all <i>RYRI</i> | MH       | 23 | GA suspicious for MH at 2 years of age: increase temperature and tachycardia resolved with dantrolene | -                                                                                                    |
| 74 | 0.4  | 2    | -   | nothing in all <i>RYRI</i> | MH       | 10 | Postoperative oxygen desaturation, temperature 41.1°C, BE -7 mEq/L, CK 920 IU/L                       | -                                                                                                    |
| 75 | 0.2  | 1.3  | -   | nothing in all <i>RYRI</i> | FH       | -  | -                                                                                                     | Positive CHCT in 2 first-degree relatives                                                            |

|    |      |      |   |                                     |                                 |   |                                                                                                                                                                                 |                                                       |
|----|------|------|---|-------------------------------------|---------------------------------|---|---------------------------------------------------------------------------------------------------------------------------------------------------------------------------------|-------------------------------------------------------|
| 76 | 1.9  | 2.9  | - | nothing in all <i>RYR1</i>          | intra operative rhabdomyolysis  | - | CK 30,000 to 200,000 IU/L after GA with volatile agent                                                                                                                          | -                                                     |
| 77 | 0.28 | 2.68 | - | nothing in all <i>RYR1</i>          | exercise induced rhabdomyolysis | - | Muscle weakness interferes with activity weekly<br>Cola colored urine<br>Heat prostration<br>Never had GA<br>Homozygous Arg50X mutation and McArdle's disease<br>histochemistry | -                                                     |
| 78 | 0.9  | 2.1  | - | No finding in 103 <i>RYR1</i> exons | FH                              | - | -                                                                                                                                                                               | -                                                     |
| 79 | 0.3  | 1.1  | - | No finding in 103 <i>RYR1</i> exons | FH                              | - | -                                                                                                                                                                               | Son had MMR after succinylcholine with CK 35,000 IU/L |
| 80 | 0.7  | 0.2  | - | No finding in 103 <i>RYR1</i> exons | MH                              | - | -                                                                                                                                                                               | -                                                     |
| 81 | 0.8  | 2    | - | No finding in 103 <i>RYR1</i> exons | FH                              | - | -                                                                                                                                                                               | Positive CHCT in sibling                              |
| 82 | 0    | 1.5  | - | No finding in 103 <i>RYR1</i> exons | FH                              | - | -                                                                                                                                                                               | Sibling had possible MH episode                       |
| 83 | 1    | 2.3  | - | No finding in 102 <i>RYR1</i> exons | FH                              | - | Severe rhabdomyolysis after succinylcholine as a child                                                                                                                          | One normal CHCT in 1st degree relative                |

|    |      |       |   |                                     |    |    |                                                               |                                                                                                        |
|----|------|-------|---|-------------------------------------|----|----|---------------------------------------------------------------|--------------------------------------------------------------------------------------------------------|
| 84 | 0.59 | 1.64  | - | No finding in 100 <i>RYR1</i> exons | MH | 15 | MMR after succinylcholine GA aborted in 1987, CK >15,000 IU/L | -                                                                                                      |
| 85 | 0.2  | 1     | - | No finding in 100 <i>RYR1</i> exons | FH | -  | -                                                             | Parent died during GA for superficial surgery with cardiac arrest at < 40 y of age, no known allergies |
| 86 | 0.5  | 1.1   | - | No finding in 100 <i>RYR1</i> exons | FH | -  | Subject was muscular<br>Never had GA                          | Subject's child is reported to have survived fulminant MH                                              |
| 87 | 0.1  | 1.2   | - | No finding in 100 <i>RYR1</i> exons | MH | 15 | Severe MMR                                                    | -                                                                                                      |
| 88 | 1.1  | 2.3   | - | No finding in 100 <i>RYR1</i> exons | -  | -  | -                                                             | -                                                                                                      |
| 89 | 0.4  | 0.9   | - | No finding in 50 <i>RYR1</i> exons  | FH | -  | -                                                             | Muscle cramping<br>GA in 1950s was reported to be complicated by increase temperature                  |
| 90 | 1.2  | 1.4   | - | No finding in 50 <i>RYR1</i> exons  | MH | -  | -                                                             | -                                                                                                      |
| 91 | 0.22 | 1.04  | - | No finding in 36 <i>RYR1</i> exons  | FH | -  | One GA with no signs of MH                                    | Son had cardiac arrest and died after short sevoflurane GA<br>Son had dystrophinopathy                 |
| 92 | 0    | 1.785 | - | No finding in 34 <i>RYR1</i> exons  | -  | -  | Spontaneous contractures of 0.68 g during CHCT                | -                                                                                                      |
| 93 | 0    | 1.2   | - | No finding in 35 <i>RYR1</i> exons  | -  | -  | -                                                             | -                                                                                                      |



|     |      |     |   |                                    |                |   |                                                                                                                                              |                                                                                                                            |
|-----|------|-----|---|------------------------------------|----------------|---|----------------------------------------------------------------------------------------------------------------------------------------------|----------------------------------------------------------------------------------------------------------------------------|
| 94  | 0    | 1.2 | - | No finding in 32 <i>RYR1</i> exons | -              | - | -                                                                                                                                            | -                                                                                                                          |
| 95  | 0.1  | 1.3 | - | No finding in 30 <i>RYR1</i> exons | FH             | - | -                                                                                                                                            | Suspected MH in 2 first-degree relatives<br>Cousin died of apparent MH                                                     |
| 96  | 0.15 | 1.8 | - | No finding in 30 <i>RYR1</i> exons | rhabdomyolysis | - | Muscle cramps at least once weekly, cola colored urine idiopathic, elevated temperature at least 6 time yearly<br>GA x 9 with no signs of MH | -                                                                                                                          |
| 97  | 0.35 | 1.4 | - | No finding in 30 <i>RYR1</i> exons | FH             | - | GA x 5 with no signs of MH                                                                                                                   | 2 first-degree relatives had suspected MH, one of whom had an equivocal CHCT                                               |
| 98  | 0.5  | 1   | - | No finding in 30 <i>RYR1</i> exons | FH             | - | Never had GA                                                                                                                                 | One cousin is reported to have survived a fulminant MH event 6 relatives had equivocal CHCT<br>2 relatives had normal CHCT |
| 99  | 0.7  | 4   | - | No finding in 30 <i>RYR1</i> exons | FH             | - | Never had GA                                                                                                                                 | Second-degree relative had suspected MH                                                                                    |
| 100 | 1.9  | 3.4 | - | No finding in 30 <i>RYR1</i> exons | FH             | - | One GA with no signs of MH                                                                                                                   | First-degree relative and cousin had suspected MH                                                                          |
| 101 | 1.1  | 2.6 | - | No finding in 30 <i>RYR1</i> exons | FH             | - | One GA with no signs of MH                                                                                                                   | Sibling had suspected MH episode                                                                                           |
| 102 | 0.3  | 2.4 | - | No finding in 30 <i>RYR1</i> exons | -              | - | -                                                                                                                                            | -                                                                                                                          |

|     |      |      |   |                                    |   |   |   |   |
|-----|------|------|---|------------------------------------|---|---|---|---|
| 103 | 0.5  | 5.61 | - | No finding in 30 <i>RYRI</i> exons | - | - | - | - |
| 104 | 1    | 5.14 | - | No finding in 30 <i>RYRI</i> exons | - | - | - | - |
| 105 | 0    | 1.56 | - | No finding in 30 <i>RYRI</i> exons | - | - | - | - |
| 106 | 1.5  | 6.3  | - | No finding in 30 <i>RYRI</i> exons | - | - | - | - |
| 107 | 0.3  | 0.9  | - | No finding in 30 <i>RYRI</i> exons | - | - | - | - |
| 108 | 1.3  | 3    | - | No finding in 30 <i>RYRI</i> exons | - | - | - | - |
| 109 | 0    | 1.4  | - | No finding in 30 <i>RYRI</i> exons | - | - | - | - |
| 110 | 1.1  | 2.6  | - | No finding in 30 <i>RYRI</i> exons | - | - | - | - |
| 111 | 0.45 | 2.3  | - | No finding in 30 <i>RYRI</i> exons | - | - | - | - |
| 112 | 0.15 | 1.5  | - | No finding in 30 <i>RYRI</i> exons | - | - | - | - |
| 113 | 0.55 | 0.8  | - | No finding in 30 <i>RYRI</i> exons | - | - | - | - |

|     |      |     |   |                                    |    |    |                           |   |
|-----|------|-----|---|------------------------------------|----|----|---------------------------|---|
| 114 | 0.2  | 1.4 | - | No finding in 30 <i>RYRI</i> exons | -  | -  | -                         | - |
| 115 | 0    | 2   | - | No finding in 30 <i>RYRI</i> exons | -  | -  | -                         | - |
| 116 | 0.1  | 1.3 | - | No finding in 30 <i>RYRI</i> exons | -  | -  | -                         | - |
| 117 | n/a  | 4.5 | - | No finding in 30 <i>RYRI</i> exons | -  | -  | -                         | - |
| 118 | 1.9  | 1.7 | - | No finding in 30 <i>RYRI</i> exons | -  | -  | -                         | - |
| 119 | n/a  | 1.6 | - | No finding in 30 <i>RYRI</i> exons | -  | -  | -                         | - |
| 120 | 1.35 | 2.7 | - | No finding in 30 <i>RYRI</i> exons | MH | 18 | CGS was reported to be 18 | - |

Descriptions of personal and familial medical history were reported by the MH Diagnostic Center Directors to the North American Malignant Hyperthermia Registry on the Malignant Hyperthermia Biopsy and Diagnostic Consultation Report unless another source is noted. When MH was an indication for CHCT the subject had experienced a suspected MH episode in the judgment of the MH Diagnostic Testing Center Director. The drugs given as part of this anesthetic are noted when this information was available. Variants of uncertain significance (VUS) which have been reported before are noted in black, novel variants are noted in blue font,

known MH mutations are noted in red font, amino acid substitutions in *green italics* indicate known polymorphisms. Beige highlighting indicates that this subject had no findings in previous studies at Uniformed Services University of the Health Sciences. A dash (-) indicates there is no information.

ADR is adverse drug reaction, BE is base excess, CCD is central core disease, CGS is the Clinical Grading Scale, also known as the Larach Scale, CHCT is caffeine halothane contracture test, CK is creatine kinase, ETCO<sub>2</sub> is end-tidal carbon dioxide, FH is family history of MH susceptibility, GA is general anesthesia (GA x 2, or another number, reflects the number of general anesthetics the subject has had), IV is intravenous, MH is malignant hyperthermia, MMR is masseter muscle rigidity, MV is minute ventilation, PVCs are premature ventricular conduction, na is not applicable (not done).

<sup>a</sup>This case was reported in McKenney KA, Holman SJ. Delayed postoperative rhabdomyolysis in a patient subsequently diagnosed as malignant hyperthermia susceptible. *Anesthesiology* 2002; 96:764-5.
